# Supplementary material
Source: Springer Nature journal article supplement (https://www.springermedizin.de/resource/supplementary/12871_2013_212_MOESM2_ESM.pdf/9429156)

**p = 0.002**

**Net fluid balance (ml/12h)**

14000  
12000  
10000  
8000  
6000  
4000  
2000  
0  
-2000  
-4000

**12 hours before**

**Hours 0 to 12**

**Hours 12 to 24**

**TPE**

**after TPE**

**after TPE**

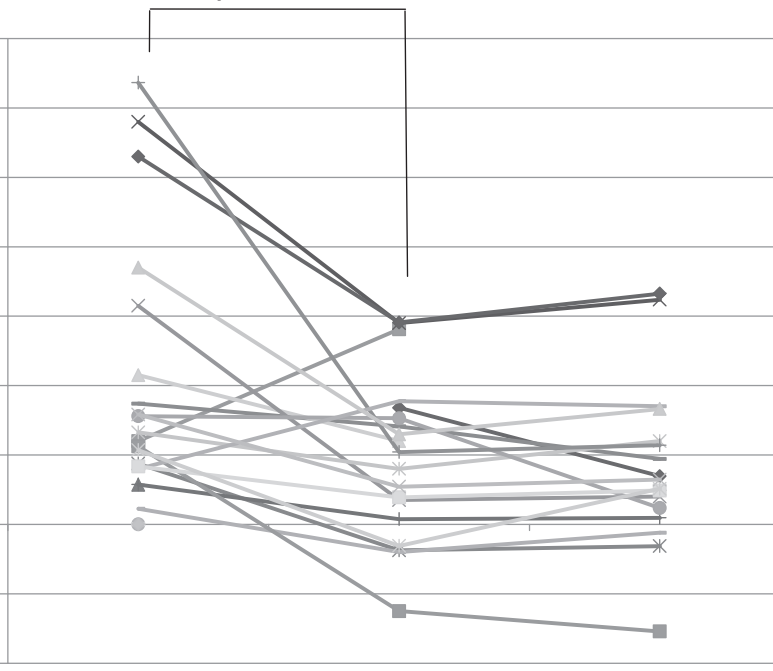

Supplement: MOESM2 [file 9429156]
